# Supplementary material
Source: Springer Nature journal article supplement (https://www.springermedizin.de/resource/supplementary/12936_2011_2094_MOESM5_ESM.pdf/9543478)

*pfprt* genotypes

- CVIET
- CVIDT
- SVMNT
- CVMNT

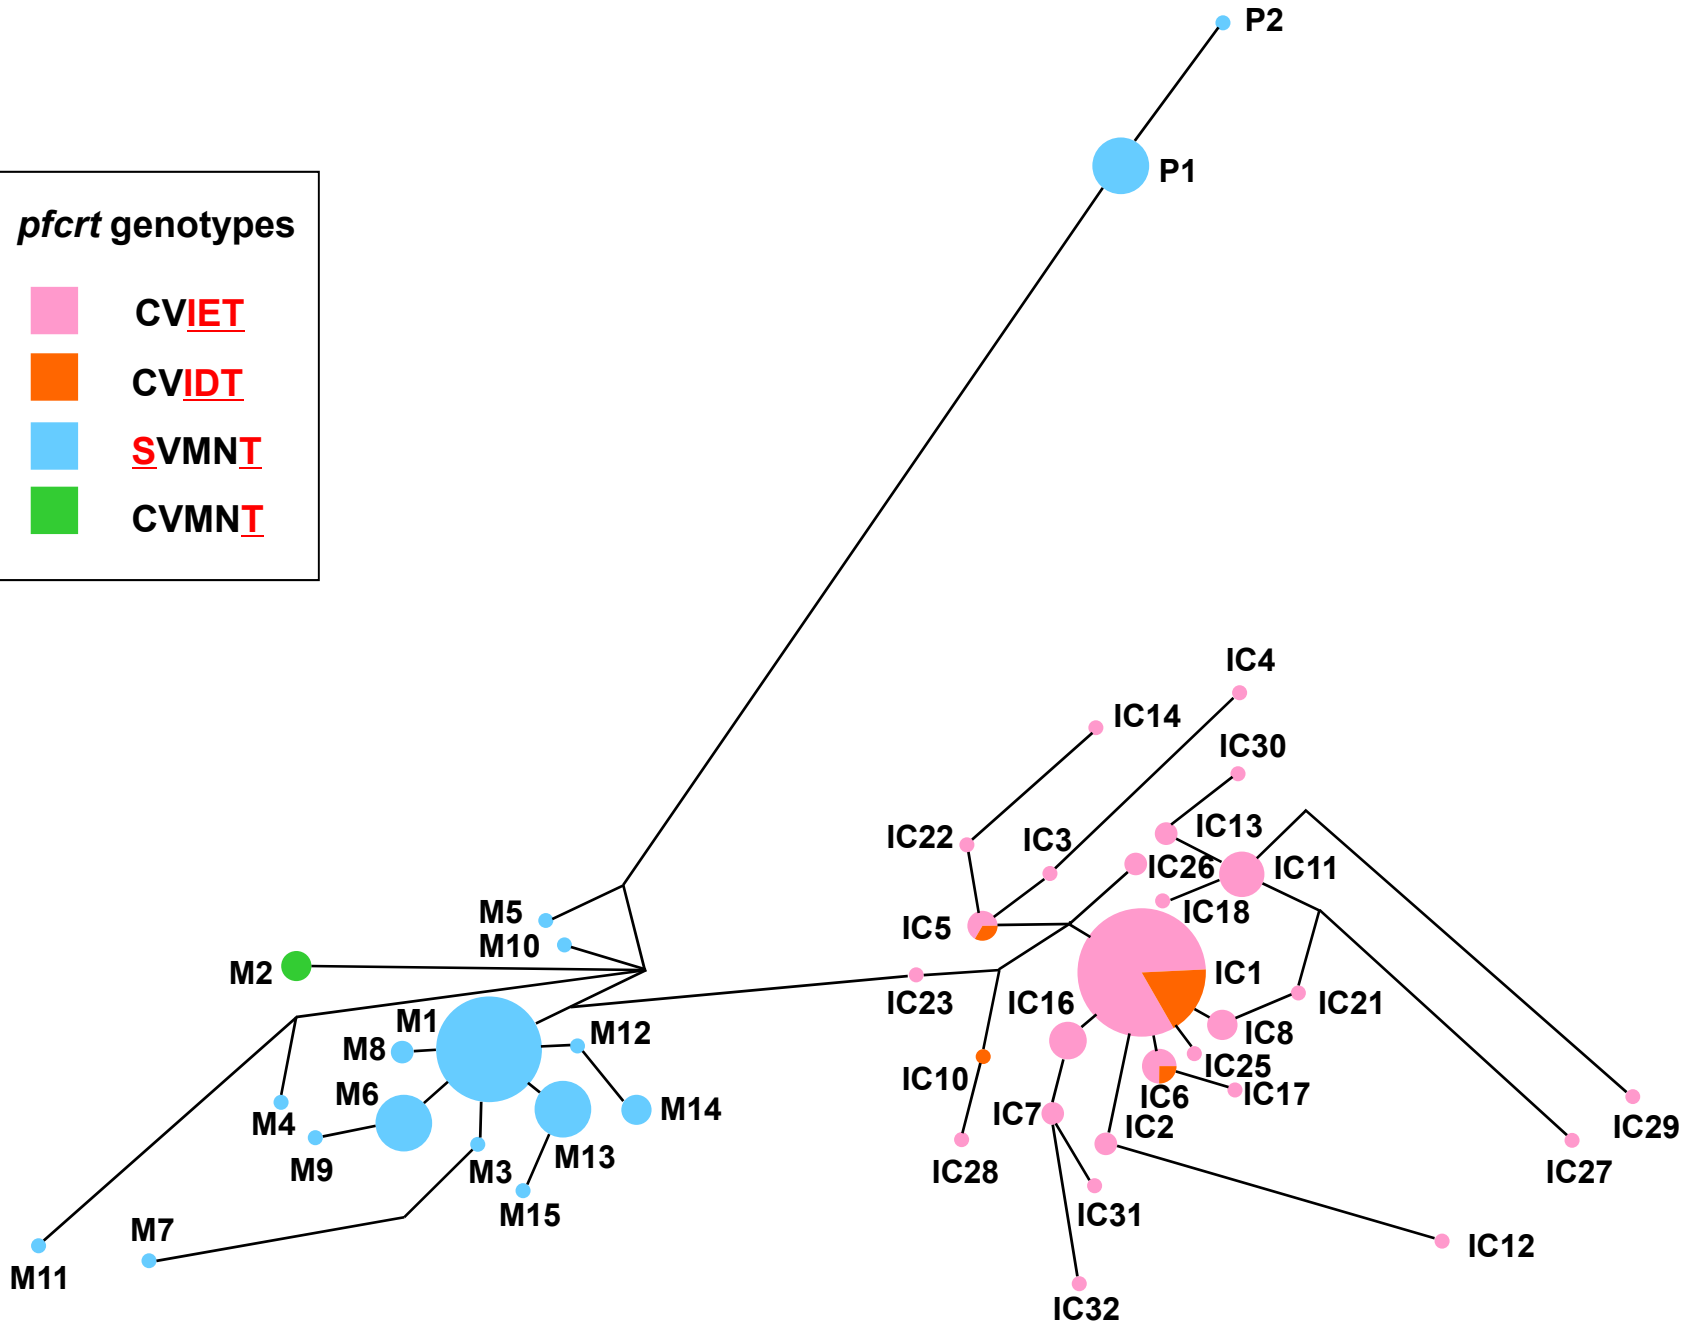

Supplement: MOESM5 [file 9543478]
